# Supplementary material for: Mitochondrial Hyperactivation and Enhanced ROS Production are Involved in Toxicity Induced by Oncogenic Kinases Over-Signaling
Source: PubMed Central journal article supplement (PMC6316814; doi:10.3390/cancers10120509), 2018-12-12
Supplement: cancers-10-00509-s001.pdf [file cancers-10-00509-s001.pdf]

# Supplementary Materials: Mitochondrial Hyperactivation and Enhanced ROS Production are Involved in Toxicity Induced by Oncogenic Kinases Over-Signaling.

Monica Ceccon, Mario Mauri, Luca Massimino, Giovanni Giudici, Rocco Piazza, Carlo Gambacorti-Passerini and Luca Mogni

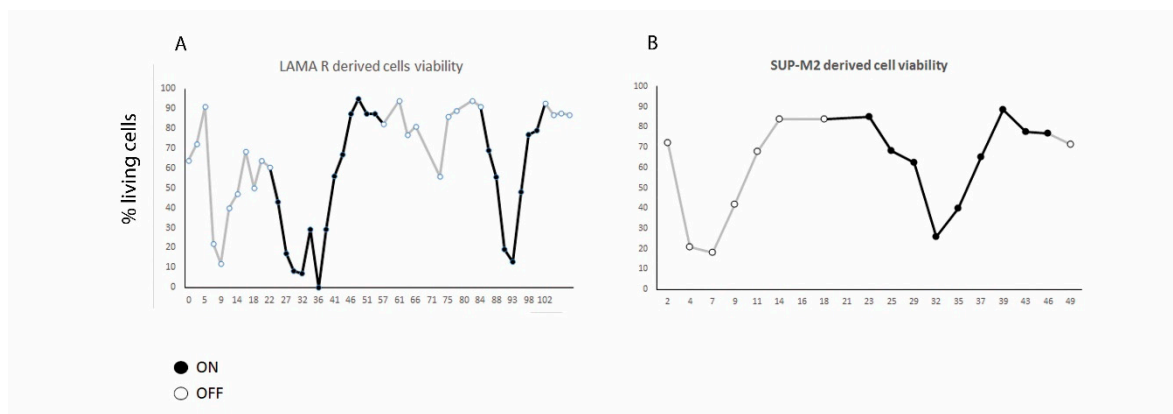

**Figure S1.** Viability of LAMA-R and SUP-M2LR during the drug holiday schedule. Days of culture are shown on the X axis (A) Drug holiday simulation on LAMA-R cells. White dots: drug off. Black dots: drug on. (B) Drug holiday simulation on SUP-M2 LR cells. White dots: drug off. Black dots: drug on.

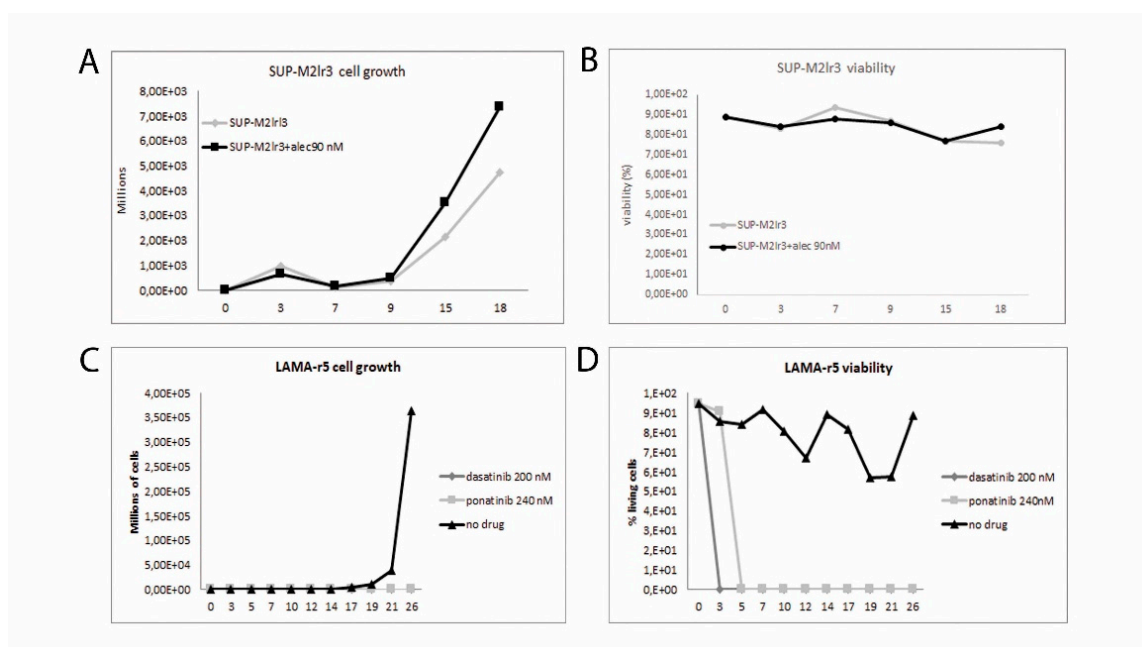

**Figure S2.** SUP-M2lr3 and LAMAr5 growth and viability after alternative TKI treatment. Days of culture are shown on the x axis. (A) SUP-M2 lr3 were grown in the presence of the indicated drug. The number of cells was normalized on the previous dilution factor. (B) SUP-M2 lr3 viability was also evaluated. Viable cell count was assessed by trypan blue. (C) LAMA-R were grown in the presence

of the indicated drug. The number of cells was normalized on the previous dilution factor. (D) LAMA-R viability was also evaluated. Viable cell count was assessed by trypan blue.

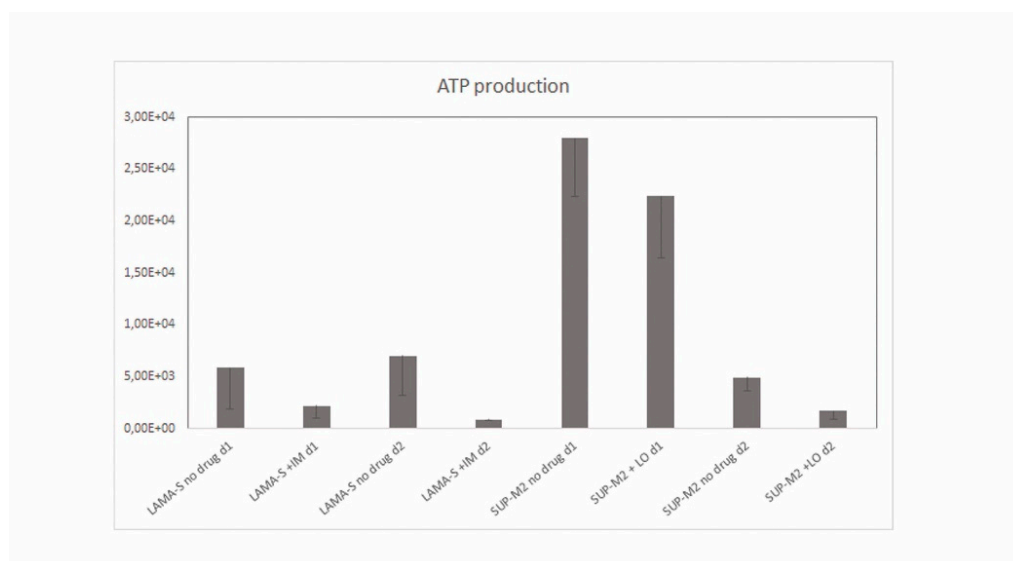

**Figure S3.** ATP production after 1 or 2 days of TKI treatment in LAMA-S and SUP-M2 parental cells.

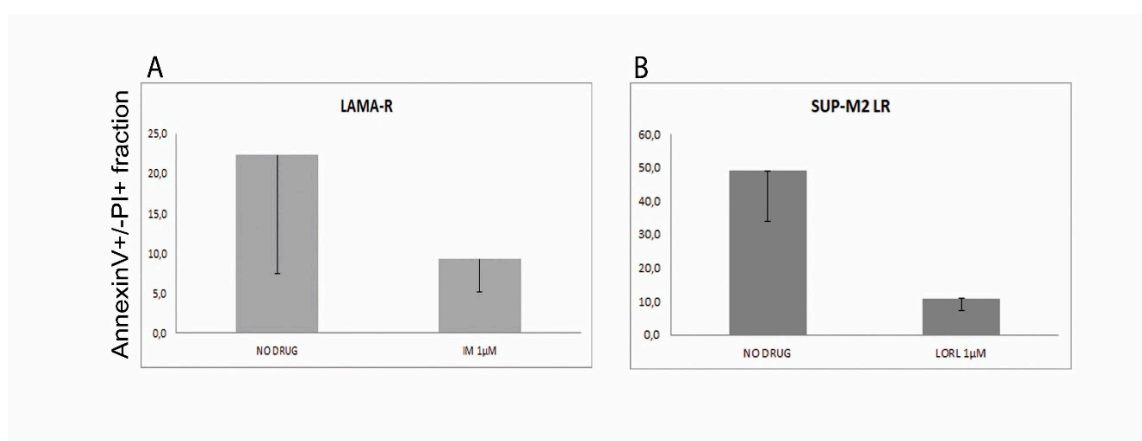

**Figure S4.** Late apoptotic cells fraction was evaluated at FACS analysis as the double positive ANNEXIN V+ / PI+. (A) Late apoptotic LAMA-R cells 5 days after drug withdrawal, (B) Late apoptotic SUP-M2 LR cells 4 days after drug withdrawal.

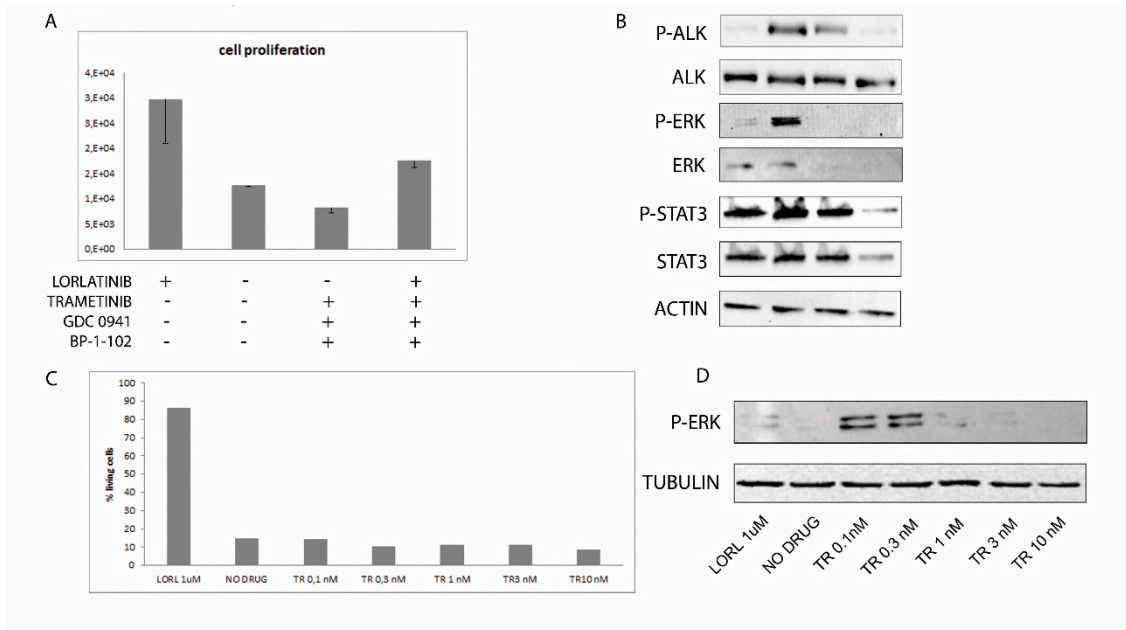

**Figure S5.** Simultaneous inhibition of MEK, PI3K and STAT3 in SUP-M2 LR cells after lorlatinib withdrawal. (A) SUP-M2 LR were treated with the indicated drugs at the following concentrations: Lorlatinib [1 μM], trametinib [3 nM], GDC 0941 [100 nM], BP-1-102 [8 μM]. After 4 days cells were harvested an, equal amount were plated and stained with Florometric Cell Proliferation Assay Kit. (B) Indicated targets, where possible, were analyzed by western blot. (C) SUP-M2 LR were plated with lorlatinib, without drug or with the single trametinib at indicated doses. Viability was assessed at trypan blue count. (D) ERK activation was assessed for each condition.

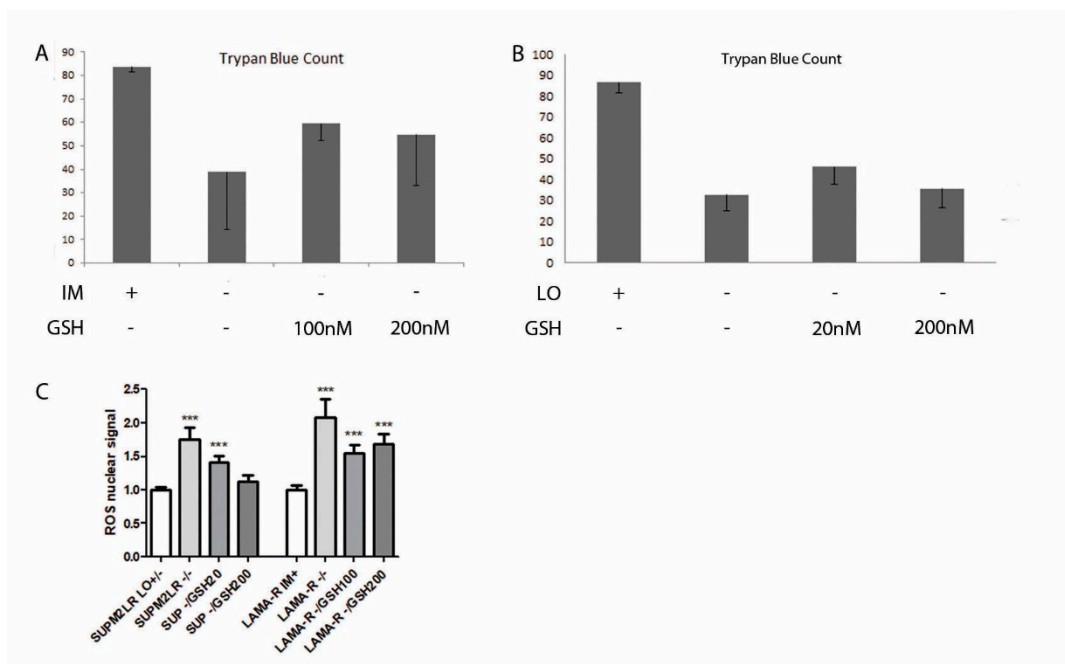

**Figure S6.** GSH treatment is able to partially restore cell death after drug withdrawal. (A) In LAMA-R and (B) SUP-M2 LR Drugs were added at the indicated dose. Viability was assessed by trypan blue 5 days for LAMA-R and 3 days for SUP-M2-LR cells upon drug withdrawal, (C) ROS quantification was performed by confocal microscopy after 3 days or 1 day upon drug withdrawal for LAMA-R and SUP-M2 cells respectively.
